# Supplementary material
Source: PubMed Central journal article supplement (PMC9125570)
Supplement: Supp_FigS1.pdf [file Supp_FigS1.pdf]

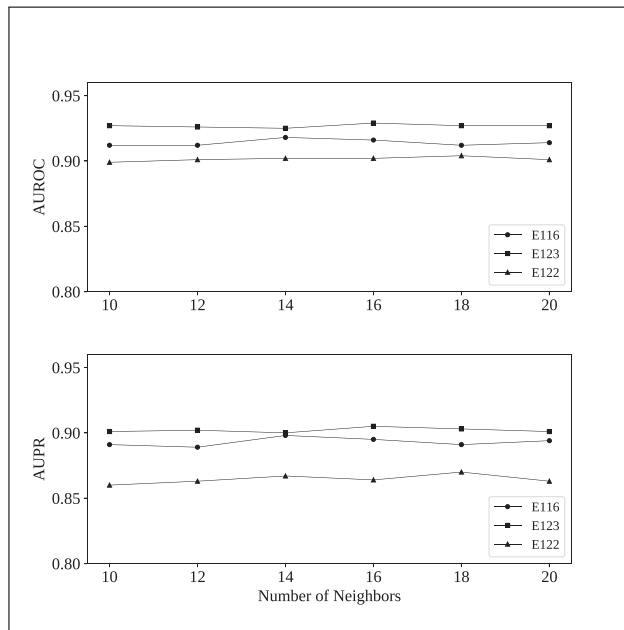

**Figure S1: Effect of number of neighbors on classification performance.** The performance of the model on the classification task is plotted as a function of the number of neighbors subsampled for each genic node. Including additional neighbors beyond 10 does not lead to substantial performance improvements with respect to either (a) AUROC or (b) AUPR.
