# Supplementary material
Source: PubMed Central journal article supplement (PMC9125570)
Supplement: Supp_FigS3.pdf [file Supp_FigS3.pdf]

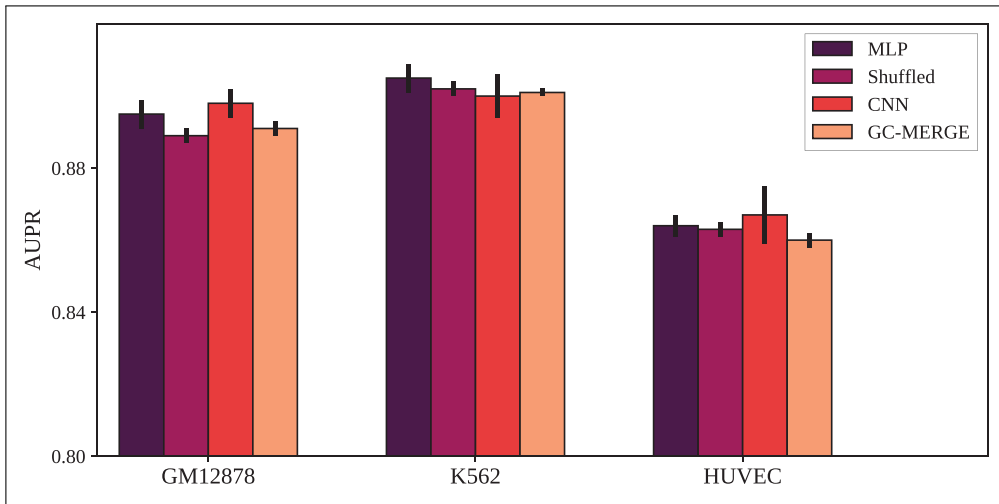

Figure S3: **Comparison of AUPR scores for all models.** GC-MERGE gives state-of-the-art performance for classifying genes as either having high expression or low expression. Using the AUPR metric, GC-MERGE obtains scores of 0.88, 0.89, and 0.88 for GM12878, K562, and HUVEC, respectively.
