# Supplementary material
Source: PubMed Central journal article supplement (PMC9125570)
Supplement: Supp_FigS4.pdf [file Supp_FigS4.pdf]

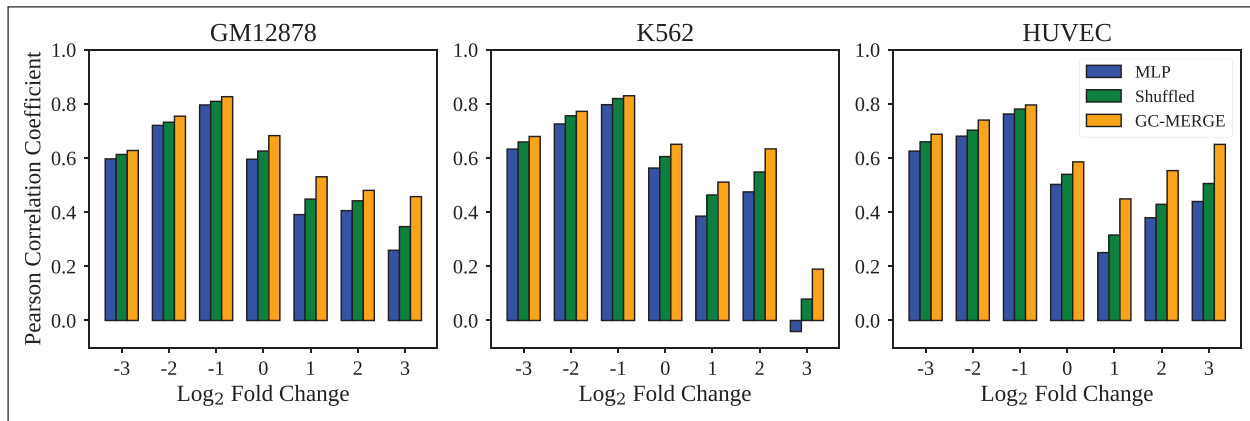

**Figure S4: Model performance broken down by level of differential expression.** For each cell line (GM12878, K562, and HUVEC), genes are stratified into subgroups binned by their log-2 fold change :  $(-\infty, -3)$ ,  $[-3, -2)$ ,  $[-2, -1)$ ,  $[-1, 0)$ ,  $[0, 1)$ ,  $[1, 2)$ ,  $[2, 3)$ ,  $[3, \infty)$ . GC-MERGE consistently outperforms both the MLP and shuffled baselines, but the performance improvement is greater for genes with higher differential expression.
