# Supplementary material
Source: PubMed Central journal article supplement (PMC9125570)
Supplement: Supp_FigS5.pdf [file Supp_FigS5.pdf]

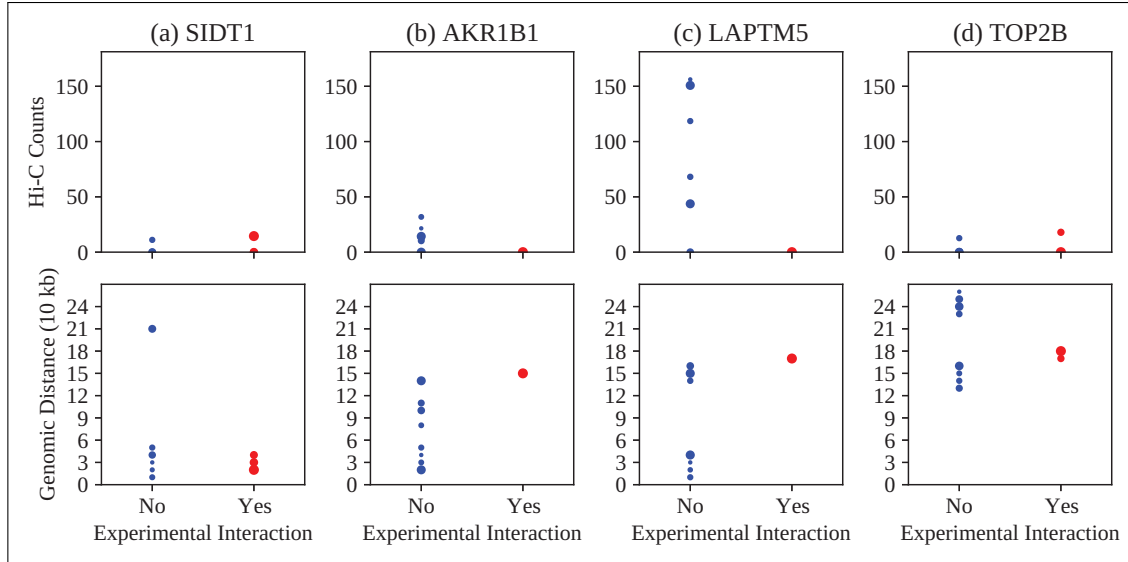

**Figure S5: Relationships among importance scores, genomic distances, and Hi-C counts for all exemplar genes with promoter-capture Hi-C validated regulatory interactions.** The exemplar genes are shown by column as follows: (a) SIDT1, (b) AKR1B1, (c) LAPT5, and (d) TOP2B. The size of each data point corresponds to the neighbor node's scaled importance score. Nodes corresponding to experimentally validated interacting fragments are denoted in red and all others are denoted in blue. The top panel plots Hi-C counts classified according to experimental validation, while as the bottom panel plots genomic distance versus experimental interaction. Neither Hi-C counts nor genomic distance correlate with experimentally validated interactions.
