# Supplementary material
Source: PubMed Central journal article supplement (PMC9125570)
Supplement: Supp_TableS3.pdf [file Supp_TableS3.pdf]

| <b>Gene</b> | <b>Neighbor Node ID</b>  | <b>Node Coordinates</b>  | <b>Regulatory Region Coordinates</b>                |
|-------------|--------------------------|--------------------------|-----------------------------------------------------|
| TOP2B       | 51819                    | chr3:25830000-25840000   |                                                     |
|             | 51820                    | chr3:25840000-25850000   |                                                     |
|             | 51821                    | chr3:25850000-25860000   |                                                     |
|             | 51822                    | chr3:25860000-25870000   |                                                     |
|             | 51823                    | chr3:25870000-25880000   | chr3:25878006-25881223                              |
|             | 51824                    | chr3:25880000-25890000   | chr3:25884649-25888494,<br>chr3:25878006-25881223   |
|             | 51829                    | chr3:25930000-25940000   |                                                     |
|             | 51830                    | chr3:25940000-25950000   |                                                     |
|             | 51831                    | chr3:25950000-25960000   |                                                     |
|             | 51832                    | chr3:25960000-25970000   | chr3:113212739-113215893                            |
| SIDT1       | 60557                    | chr3:113210000-113220000 | chr3:113212739-113215893                            |
|             | 60558                    | chr3:113220000-113230000 | chr3:113228501-113232053                            |
|             | 60559                    | chr3:113230000-113240000 | chr3:113228501-113232053                            |
|             | 60560                    | chr3:113240000-113250000 |                                                     |
|             | 60562                    | chr3:113260000-113270000 |                                                     |
|             | 60563                    | chr3:113270000-113280000 |                                                     |
|             | 60564                    | chr3:113280000-113290000 |                                                     |
|             | 60565                    | chr3:113290000-113300000 |                                                     |
|             | 60566                    | chr3:113300000-113310000 |                                                     |
| 60582       | chr3:113460000-113470000 |                          |                                                     |
| LAPTM5      | 3119                     | chr1:31190000-31200000   |                                                     |
|             | 3120                     | chr1:31200000-31210000   |                                                     |
|             | 3124                     | chr1:31240000-31250000   |                                                     |
|             | 3125                     | chr1:31250000-31260000   |                                                     |
|             | 3137                     | chr1:31370000-31380000   |                                                     |
|             | 3138                     | chr1:31380000-31390000   |                                                     |
|             | 3139                     | chr1:31390000-31400000   |                                                     |
|             | 3140                     | chr1:31400000-31410000   | chr1:31401583-31405576                              |
| AKR1B1      | 136734                   | chr7:134120000-134130000 |                                                     |
|             | 136738                   | chr7:134160000-134170000 |                                                     |
|             | 136739                   | chr7:134170000-134180000 |                                                     |
|             | 136740                   | chr7:134180000-134190000 |                                                     |
|             | 136741                   | chr7:134190000-134200000 |                                                     |
|             | 136744                   | chr7:134220000-134230000 |                                                     |
|             | 136746                   | chr7:134240000-134250000 |                                                     |
|             | 136747                   | chr7:134250000-134260000 |                                                     |
|             | 136750                   | chr7:134280000-134290000 |                                                     |
|             | 136751                   | chr7:134290000-134300000 | chr7:134293046-134298798                            |
| BAX         | 264946                   | chr19:49350000-49360000  |                                                     |
|             | 264947                   | chr19:49360000-49370000  |                                                     |
|             | 264948                   | chr19:49370000-49380000  | chr19:49376085-49376585,<br>chr19:49376745-49377245 |

|         |        |                         |                                                                                 |
|---------|--------|-------------------------|---------------------------------------------------------------------------------|
|         | 264949 | chr19:49380000-49390000 |                                                                                 |
|         | 264950 | chr19:49390000-49400000 |                                                                                 |
|         | 264951 | chr19:49400000-49410000 | chr19:49401746-49402745                                                         |
|         | 264952 | chr19:49410000-49420000 |                                                                                 |
|         | 264954 | chr19:49430000-49440000 |                                                                                 |
|         | 264955 | chr19:49440000-49450000 |                                                                                 |
|         | 264957 | chr19:49460000-49470000 |                                                                                 |
|         | 200464 | chr12:54610000-54620000 |                                                                                 |
|         | 200468 | chr12:54650000-54660000 |                                                                                 |
|         | 200471 | chr12:54680000-54690000 | chr12:54689425-54689965                                                         |
|         | 200473 | chr12:54700000-54710000 | chr12:54700765-54701285                                                         |
| HNRNPA1 | 200474 | chr12:54710000-54720000 |                                                                                 |
|         | 200475 | chr12:54720000-54730000 |                                                                                 |
|         | 200476 | chr12:54730000-54740000 |                                                                                 |
|         | 200477 | chr12:54740000-54750000 |                                                                                 |
|         | 200478 | chr12:54750000-54760000 |                                                                                 |
|         | 200479 | chr12:54760000-54770000 |                                                                                 |
|         | 261291 | chr19:12800000-12810000 |                                                                                 |
|         | 261292 | chr19:12810000-12820000 |                                                                                 |
|         | 261294 | chr19:12830000-12840000 |                                                                                 |
|         | 261295 | chr19:12840000-12850000 |                                                                                 |
| PRDX2   | 261297 | chr19:12860000-12870000 |                                                                                 |
|         | 261298 | chr19:12870000-12880000 |                                                                                 |
|         | 261299 | chr19:12880000-12890000 | chr19:12886184-12886825,<br>chr19:12888325-12888845,<br>chr19:12889945-12890545 |
|         | 261304 | chr19:12930000-12940000 | chr19:12935945-12936745                                                         |
|         | 261305 | chr19:12940000-12950000 | chr19:12943165-12943725                                                         |
|         | 261308 | chr19:12970000-12980000 |                                                                                 |
|         | 261310 | chr19:12990000-13000000 | chr19:12995825-12996325,<br>chr19:12996905-12998745                             |
|         | 261311 | chr19:13000000-13010000 |                                                                                 |
| RAD23A  | 261313 | chr19:13020000-13030000 |                                                                                 |
|         | 261314 | chr19:13030000-13040000 |                                                                                 |
|         | 261315 | chr19:13040000-13050000 | chr19:13049025-13049663                                                         |
|         | 261317 | chr19:13060000-13070000 |                                                                                 |
|         | 261331 | chr19:13200000-13210000 |                                                                                 |
|         | 261332 | chr19:13210000-13220000 |                                                                                 |
|         | 261333 | chr19:13220000-13230000 |                                                                                 |

---

**Table S3: Neighbor coordinates for exemplar genes.** The second column lists the node identifiers for all neighboring nodes of the relevant gene, including neighboring nodes that contain interacting fragments as well as those that do not. The third column third lists the corresponding chromosome coordinates for the node identifier. The fourth column lists the regulatory fragments that interact with each gene as described in Jung et al. (2019) and Fulco et al. (2019)
