# Supplementary material
Source: PubMed Central journal article supplement (PMC9125570)
Supplement: Supp_TableS4.pdf [file Supp_TableS4.pdf]

| Cell Line | Model    | AUROC Mean | AUROC Standard Deviation | AUPRC Mean | AUPRC Standard Deviation |
|-----------|----------|------------|--------------------------|------------|--------------------------|
| E116      | GC-MERGE | 0.905      | 0.001                    | 0.880      | 0.002                    |
|           | Shuffled | 0.903      | 0.000                    | 0.879      | 0.002                    |
|           | CNN      | 0.896      | 0.002                    | 0.865      | 0.004                    |
|           | MLP      | 0.899      | 0.001                    | 0.870      | 0.004                    |
|           | RF-class | 0.901      | 0.002                    | 0.864      | 0.003                    |
|           | Logistic | 0.900      | 0.000                    | 0.900      | 0.000                    |
| E123      | GC-MERGE | 0.919      | 0.001                    | 0.892      | 0.001                    |
|           | Shuffled | 0.914      | 0.001                    | 0.886      | 0.002                    |
|           | CNN      | 0.907      | 0.003                    | 0.867      | 0.006                    |
|           | MLP      | 0.917      | 0.002                    | 0.889      | 0.004                    |
|           | RF-class | 0.929      | 0.001                    | 0.901      | 0.003                    |
|           | Logistic | 0.921      | 0.000                    | 0.921      | 0.000                    |
| E122      | GC-MERGE | 0.903      | 0.001                    | 0.876      | 0.002                    |
|           | Shuffled | 0.899      | 0.001                    | 0.866      | 0.002                    |
|           | CNN      | 0.889      | 0.002                    | 0.847      | 0.008                    |
|           | MLP      | 0.899      | 0.001                    | 0.864      | 0.003                    |
|           | RF-class | 0.890      | 0.001                    | 0.852      | 0.005                    |
|           | Logistic | 0.879      | 0.000                    | 0.879      | 0.000                    |

Table S4: **Model comparisons by AUROC and AUPRC for the classification task.** GC-MERGE as well as the alternative deep learning baselines - shuffled, CNN, and MLP - are described in the main text. In addition, we include two other machine learning baselines: a random forest classifier (RF-class) and a logistic regression model (Logistic). Note that with the exception of E123, in which the random forest classifier's performance exceeds that of GC-MERGE, our model consistently achieves higher scores than all other baselines.
