# Supplementary material
Source: PubMed Central journal article supplement (PMC9125570)
Supplement: Supp_TableS5.pdf [file Supp_TableS5.pdf]

| <b>Cell Line</b> | <b>Model</b> | <b>PCC Mean</b> | <b>PCC Standard Deviation</b> |
|------------------|--------------|-----------------|-------------------------------|
| E116             | GC-MERGE     | 0.766           | 0.001                         |
|                  | Shuffled     | 0.762           | 0.002                         |
|                  | CNN          | 0.756           | 0.004                         |
|                  | MLP          | 0.761           | 0.001                         |
|                  | RF-reg       | 0.760           | 0.001                         |
| E123             | GC-MERGE     | 0.786           | 0.001                         |
|                  | Shuffled     | 0.779           | 0.001                         |
|                  | CNN          | 0.762           | 0.004                         |
|                  | MLP          | 0.780           | 0.001                         |
|                  | RF-reg       | 0.785           | 0.001                         |
| E122             | GC-MERGE     | 0.758           | 0.001                         |
|                  | Shuffled     | 0.739           | 0.002                         |
|                  | CNN          | 0.717           | 0.004                         |
|                  | MLP          | 0.737           | 0.002                         |
|                  | RF-reg       | 0.734           | 0.001                         |

Table S5: **Model comparisons by PCC score for the regression task.** GC-MERGE as well as the alternative deep learning baselines - shuffled, CNN, and MLP - are described in the main text. In addition, we include another deep learning baseline, a random forest regression model (RF-reg). GC-MERGE consistently achieves higher performance than all other baselines.
