# Supplementary material
Source: PubMed Central journal article supplement (PMC9125570)
Supplement: Supp_TableS6.pdf [file Supp_TableS6.pdf]

| Performance Improvement         | Gene Expression Category ( $\text{Log}_2$ Fold Change) |          |          |          |          |          |          |
|---------------------------------|--------------------------------------------------------|----------|----------|----------|----------|----------|----------|
|                                 | -3                                                     | -2       | -1       | 0        | 1        | 2        | 3        |
| <b>GC-MERGE versus MLP</b>      | 0.046583                                               | 0.04663  | 0.03228  | 0.086054 | 0.1546   | 0.135913 | 0.213187 |
| <b>GC-MERGE versus Shuffled</b> | 0.020962                                               | 0.025374 | 0.014269 | 0.049417 | 0.087833 | 0.08284  | 0.122037 |

**Table S6: Performance improvement of GC-MERGE over shuffled and MLP baselines.** Similar to Supplementary Figure S4, the performance improvement (change in PCC) of GC-MERGE over the MLP and shuffled baselines are broken down by differential expression. It can be seen that the advantage of GC-MERGE over the other two baselines is greater for genes that have high differential expression.
