# Supplementary material
Source: PubMed Central journal article supplement (PMC9125570)
Supplement: Supp_TableS7.pdf [file Supp_TableS7.pdf]

| <b>Gene</b> | <b>Neighbor Node ID</b> | <b>Importance Score</b> | <b>Distance (10 kb)</b> | <b>Hi-C Counts</b> |
|-------------|-------------------------|-------------------------|-------------------------|--------------------|
| TOP2B       | 51819                   | 4.3                     | 13                      | 186                |
|             | 51820                   | 3.0                     | 14                      | 116                |
|             | 51821                   | 2.5                     | 15                      | 97                 |
|             | 51822                   | 6.9                     | 16                      | 87                 |
|             | 51823                   | 4.5                     | 17                      | 105                |
|             | 51824                   | 10.0                    | 18                      | 120                |
|             | 51829                   | 3.5                     | 23                      | 101                |
|             | 51830                   | 6.8                     | 24                      | 54                 |
|             | 51831                   | 5.3                     | 25                      | 47                 |
|             | 51832                   | 1.0                     | 26                      | 34                 |
| SIDT1       | 60557                   | 5.7                     | 4                       | 155                |
|             | 60558                   | 6.6                     | 3                       | 171                |
|             | 60559                   | 10.0                    | 2                       | 413                |
|             | 60560                   | 1.3                     | 1                       | 316                |
|             | 60562                   | 2.7                     | 1                       | 603                |
|             | 60563                   | 1.6                     | 2                       | 287                |
|             | 60564                   | 1.0                     | 3                       | 182                |
|             | 60565                   | 4.7                     | 4                       | 162                |
|             | 60566                   | 2.9                     | 5                       | 88                 |
| 60582       | 5.6                     | 21                      | 70                      |                    |
| LAPTM5      | 3119                    | 7.9                     | 4                       | 459                |
|             | 3120                    | 1.0                     | 3                       | 513                |
|             | 3124                    | 3.0                     | 1                       | 812                |
|             | 3125                    | 2.0                     | 2                       | 391                |
|             | 3137                    | 3.2                     | 14                      | 101                |
|             | 3138                    | 7.8                     | 15                      | 145                |
|             | 3139                    | 5.1                     | 16                      | 99                 |
|             | 3140                    | 10.0                    | 17                      | 86                 |
| AKR1B1      | 136734                  | 2.5                     | 2                       | 191                |
|             | 136738                  | 7.7                     | 2                       | 118                |
|             | 136739                  | 2.5                     | 3                       | 65                 |
|             | 136740                  | 1.0                     | 4                       | 78                 |
|             | 136741                  | 2.8                     | 5                       | 145                |
|             | 136744                  | 2.4                     | 8                       | 63                 |
|             | 136746                  | 5.0                     | 10                      | 53                 |
|             | 136747                  | 4.0                     | 11                      | 66                 |
|             | 136750                  | 7.7                     | 14                      | 73                 |
|             | 136751                  | 10.0                    | 15                      | 90                 |
| BAX         | 264946                  | 3.9                     | 10                      | 38                 |
|             | 264947                  | 4.6                     | 9                       | 45                 |
|             | 264948                  | 8.4                     | 8                       | 61                 |
|             | 264949                  | 3.5                     | 7                       | 69                 |
|             | 264950                  | 3.0                     | 6                       | 55                 |

|         |        |      |    |     |
|---------|--------|------|----|-----|
|         | 264951 | 10.0 | 5  | 79  |
|         | 264952 | 1.0  | 4  | 103 |
|         | 264954 | 3.3  | 2  | 152 |
|         | 264955 | 7.4  | 1  | 265 |
|         | 264957 | 6.7  | 1  | 153 |
|         | <hr/>  |      |    |     |
|         | 200464 | 4.8  | 6  | 44  |
|         | 200468 | 1.6  | 2  | 67  |
|         | 200471 | 6.6  | 1  | 83  |
|         | 200473 | 10.0 | 3  | 27  |
| HNRNPA1 | 200474 | 1.1  | 4  | 79  |
|         | 200475 | 5.8  | 5  | 77  |
|         | 200476 | 1.0  | 6  | 48  |
|         | 200477 | 3.3  | 7  | 37  |
|         | 200478 | 3.9  | 8  | 79  |
|         | 200479 | 7.6  | 9  | 49  |
|         | <hr/>  |      |    |     |
|         | 261291 | 1.0  | 11 | 34  |
|         | 261292 | 3.3  | 10 | 44  |
|         | 261294 | 4.8  | 8  | 57  |
|         | 261295 | 3.6  | 7  | 47  |
| PRDX2   | 261297 | 4.5  | 5  | 36  |
|         | 261298 | 5.2  | 4  | 70  |
|         | 261299 | 10.0 | 3  | 79  |
|         | 261304 | 8.1  | 2  | 116 |
|         | 261305 | 5.7  | 3  | 117 |
|         | <hr/>  |      |    |     |
|         | 261308 | 5.5  | 8  | 47  |
|         | 261310 | 9.8  | 6  | 90  |
|         | 261311 | 7.6  | 5  | 62  |
|         | 261313 | 4.9  | 3  | 32  |
| RAD23A  | 261314 | 1.0  | 2  | 73  |
|         | 261315 | 10.0 | 1  | 162 |
|         | 261317 | 4.3  | 1  | 122 |
|         | 261331 | 2.8  | 15 | 32  |
|         | 261332 | 5.7  | 16 | 20  |
|         | 261333 | 8.1  | 17 | 26  |

Table S7: **Relationships among node importance scores, distance from target gene, and Hi-C counts.** For each exemplar gene, the the node IDs of its neighbors are shown (second column) along with their importance scores (third column), distances from the target gene node (fourth column), and normalized Hi-C frequency counts (fifth column).
